# Supplementary material for: Maternal Diet Quality during Pregnancy and Allergic and Respiratory Multimorbidity Clusters in Children from the EDEN Mother–Child Cohort
Source: Nutrients. 2022 Dec 28;15(1):146. doi: 10.3390/nu15010146 (PMC9824220; doi:10.3390/nu15010146)
Supplement: Supplementary file 1 [file nutrients-15-00146-s001.zip › nutrients-2079184-supplementary.pdf]

**Table S1.** Composition of food groups used in the data analyses.

| Food groups                                                                                            | Food components                                                                                                                                                                                                                                                                                                                                                                                                                                                                                                                                                 |
|--------------------------------------------------------------------------------------------------------|-----------------------------------------------------------------------------------------------------------------------------------------------------------------------------------------------------------------------------------------------------------------------------------------------------------------------------------------------------------------------------------------------------------------------------------------------------------------------------------------------------------------------------------------------------------------|
| Fruit                                                                                                  | Apricots, melon, mangoes; peaches, prunes, cherries; strawberries, raspberries; bananas; kiwi; citrus fruit (oranges, mandarins, grapefruit); apples or pears; grapes; other fresh fruit (pineapple); dried apricots or peaches; other dried fruit                                                                                                                                                                                                                                                                                                              |
| Vegetables                                                                                             | Green beans; raw and cooked endives, spinach, cress; leek, cabbage (green, cauliflower, Brussels sprouts); broccoli; cooked carrots; zucchini, eggplant (ratatouille); peas; other vegetables (turnip, chard); vegetable soup; corn; pumpkin, sweet potatoes; green salad; grated carrot; other raw vegetables (celery, tomatoes, beets, cabbage, cucumber, radish); avocado                                                                                                                                                                                    |
| Legumes                                                                                                | Lentils, white beans, chickpeas, broad beans                                                                                                                                                                                                                                                                                                                                                                                                                                                                                                                    |
| Starch and grains                                                                                      | Mashed potatoes; boiled or baked potatoes; fried potatoes; bread (white bread or sandwich bread); wholegrain or special bread; rusks or crackers or toast; breakfast cereals (corn flakes, cheerios, chocolate, puffed cereals, muesli); pasta (macaroni, spaghetti, coquillettes); ravioli and filled pasta; rice, semolina or wheat; potato gratin                                                                                                                                                                                                            |
| Nuts                                                                                                   | Nuts, hazelnuts, almond; peanuts                                                                                                                                                                                                                                                                                                                                                                                                                                                                                                                                |
| Milk and dairy products                                                                                | Emmental, Gruyère, Comté, Beaufort; Bonbel, Babybel, Gouda, Edam, Cantal, Tommes, Morbier, St. Nectaire, Reblochon; Brie, Camembert, Pont l'Évêque, Munster, Vacherin, St Marcelin, Caprice des Dieux-type cheeses; Roquefort, blue cheeses; goat cheese; fresh cheese (Tartare, Kiri); whole milk; semi-skimmed milk; skimmed milk; cream; light cream; whipped cream; ice cream; cottage cheese or 0% fat yoghurt (plain, with fruit); cottage cheese with 20%, 30% or 40% fat; yoghurts (plain, fruit, flavoured); desserts (cream desserts, mousses, flans) |
| Fish and shellfish                                                                                     | Fresh or frozen fish (cod, pollack, whiting, sole, trout); canned fish in oil (tuna, sardines); smoked or salted fish (salmon, herring); breaded fish; fish-based ready-made dishes; shellfish (mussels, oysters, shrimp)                                                                                                                                                                                                                                                                                                                                       |
| Red meat                                                                                               | Liver (heifer, poultry); tongue, tripe, blood sausage, andouillettes, sweetbreads, kidneys; beef (excluding ground steak); ground beef steak; pork (excluding processed meat); veal meat; lamb, mutton meat                                                                                                                                                                                                                                                                                                                                                     |
| Processed meat                                                                                         | Dry sausage (or salami); mortadella, saveloy; pâté, rillettes; ham (white, cures, bacon); sausage (chipolata sausages, merguez, Strasbourg sausage)                                                                                                                                                                                                                                                                                                                                                                                                             |
| Poultry                                                                                                | Poultry (chicken, turkey), rabbit                                                                                                                                                                                                                                                                                                                                                                                                                                                                                                                               |
| Sugar-sweetened beverages                                                                              | Orange juice, grapefruit juice, pineapple juice, apple juice, grape juice; syrup; non-light cola; lemonade, sugar-sweetened sodas                                                                                                                                                                                                                                                                                                                                                                                                                               |
| Foods separated with a “,” are from the same item, foods separated with a “;” are from different item. |                                                                                                                                                                                                                                                                                                                                                                                                                                                                                                                                                                 |

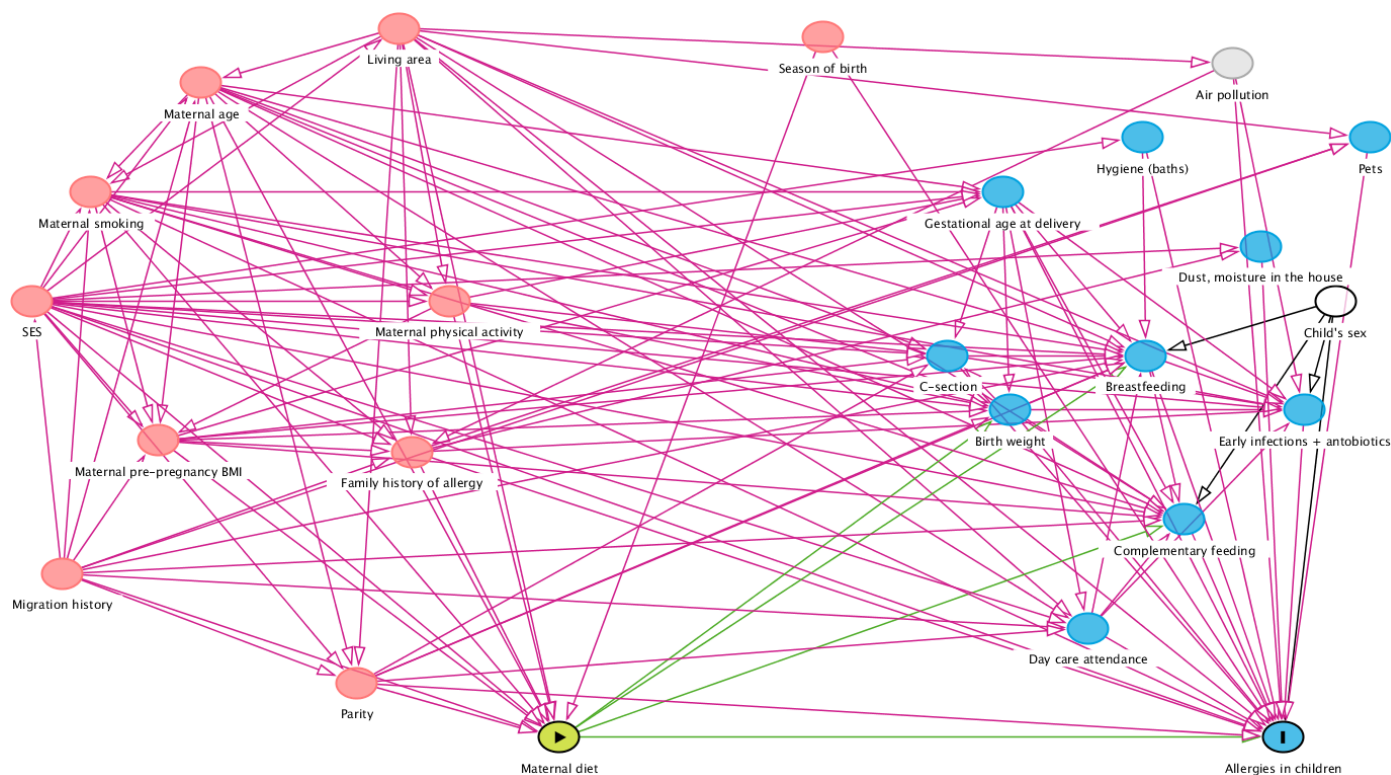

**Figure S1.** Directed Acyclic Graph (DAG) on maternal diet during pregnancy and allergic and respiratory diseases in children, used for the selection of cofounders. This graph was made with DAGitty v3.1. ([www.dagitty.net](http://www.dagitty.net), accessed 15 July 2022). The triangle in a green circle represents the main exposure (maternal diet during pregnancy) and the I in a blue circle is the outcome (allergies in children). Red circles represent potential cofounders (i.e., ancestors of exposure and outcome), intermediate factors (i.e., ancestor of the outcome but not of the exposure) are represented with blue circles. Unobservable (latent) variables are in a grey circle and variables included in the adjustment that are not cofounders are represented in a white circle. Arrows indicate the direction of causal paths. SES: socio-economic status.

**Table S2.** Comparison of included and excluded population on inclusion parameters.

|                                        | <b>Excluded<br/>population<br/><i>n</i> = 686</b> | <b>Included<br/>population<br/><i>n</i> = 1316</b> | <b><i>p</i>-value †</b> |
|----------------------------------------|---------------------------------------------------|----------------------------------------------------|-------------------------|
| Center                                 |                                                   |                                                    | 0.31                    |
| Poitiers                               | 46.8% (321)                                       | 49.2% (647)                                        |                         |
| Nancy                                  | 53.2% (365)                                       | 50.8% (669)                                        |                         |
| Maternal age at delivery (years)       | 29.0 ± 5.1                                        | 29.7 ± 4.8                                         | 0.002 *                 |
| Maternal education level               |                                                   |                                                    | <0.0001 *               |
| Up to lower secondary                  | 15.0% (89)                                        | 4.2% (55)                                          |                         |
| Upper secondary                        | 27.4% (163)                                       | 18.4% (242)                                        |                         |
| Intermediate                           | 17.7% (105)                                       | 17.9% (235)                                        |                         |
| 2-year university degree               | 17.0% (101)                                       | 23.8% (313)                                        |                         |
| ≥ 3-year university degree             | 22.9% (136)                                       | 35.8% (471)                                        |                         |
| Household income (euros/month)         |                                                   |                                                    | <0.0001 *               |
| < 800                                  | 9.2% (55)                                         | 2.9% (38)                                          |                         |
| 801–1500                               | 17.4% (104)                                       | 9.9% (130)                                         |                         |
| 1501–2300                              | 33.2% (198)                                       | 28.1% (370)                                        |                         |
| 2301–3000                              | 20.4% (122)                                       | 28.8% (379)                                        |                         |
| > 3000                                 | 19.8% (118)                                       | 30.3% (399)                                        |                         |
| Mother born abroad                     | 4.2% (25)                                         | 0.8% (11)                                          | <0.0001 *               |
| Smoking during pregnancy               | 34.5% (183)                                       | 22.9% (301)                                        | <0.0001 *               |
| Pre-pregnancy BMI (kg/m <sup>2</sup> ) | 23.6 ± 5.4                                        | 23.1 ± 4.3                                         | 0.04 *                  |
| Season of birth                        |                                                   |                                                    | 0.0002 *                |
| Autumn/winter                          | 54.4% (373)                                       | 45.5% (599)                                        |                         |
| Spring/summer                          | 45.6% (313)                                       | 54.5% (717)                                        |                         |
| Primiparity                            | 40.9% (240)                                       | 46.2% (608)                                        | 0.03*                   |
| Boys                                   | 52.5% (308)                                       | 52.6% (692)                                        | 0.96                    |
| Family history of allergy              | 42.3% (290)                                       | 53.0% (698)                                        | <0.0001*                |

Values are % (*n*) or mean ± standard deviation. † *p*-values of Pearson chi-square test for categorical variables and of Student t-test for continuous variables. \* *p*-value < 0.05. BMI: Body Mass Index.

**Table S3.** Detailed allergic and respiratory characteristics of allergic and respiratory multimorbidity clusters up to 8 years ( $n = 1593$ ).

|                               | Total<br><br>$n = 1593$ | Allergic and respiratory multimorbidity clusters |                              |                                                 |                                 |
|-------------------------------|-------------------------|--------------------------------------------------|------------------------------|-------------------------------------------------|---------------------------------|
|                               |                         | asymptomatic<br><br>$n = 1075$                   | asthma only<br><br>$n = 223$ | allergies<br>without<br>asthma<br><br>$n = 184$ | multi-allergic<br><br>$n = 111$ |
| Food allergy reported at      |                         |                                                  |                              |                                                 |                                 |
| 1 year †                      | 4.4% (67)               | 1.2% (12)                                        | 1.4% (3)                     | 17.9% (32)                                      | 18.0% (20)                      |
| 2 years †                     | 4.7% (67)               | 1.1% (10)                                        | 2.1% (4)                     | 19.3% (33)                                      | 20.6% (20)                      |
| 3 years †                     | 5.2% (68)               | 1.8% (15)                                        | 1.6% (3)                     | 15.4% (25)                                      | 25.3% (25)                      |
| 4 years †                     | 5.3% (65)               | 2.0% (16)                                        | 2.9% (5)                     | 14.7% (22)                                      | 23.9% (22)                      |
| 5 years †                     | 6.6% (78)               | 2.3% (18)                                        | 2.4% (4)                     | 19.6% (30)                                      | 28.3% (26)                      |
| 8 years †                     | 6.7% (59)               | 2.7% (16)                                        | 3.4% (4)                     | 19.5% (22)                                      | 27.4% (17)                      |
| Eczema reported at            |                         |                                                  |                              |                                                 |                                 |
| 1 year                        | 14.6% (229)             | 5.3% (56)                                        | 4.5% (10)                    | 55.7% (102)                                     | 55.0% (61)                      |
| 2 years                       | 9.7% (137)              | 4.1% (39)                                        | 3.1% (6)                     | 34.5% (59)                                      | 32.7% (33)                      |
| 3 years                       | 11.2% (146)             | 4.3% (37)                                        | 2.2% (4)                     | 40.2% (66)                                      | 39.8% (39)                      |
| 4 years                       | 11.1% (136)             | 4.0% (32)                                        | 1.7% (3)                     | 39.7% (60)                                      | 44.1% (41)                      |
| 5 years                       | 9.4% (112)              | 4.0% (31)                                        | 1.8% (3)                     | 31.4% (48)                                      | 32.6% (30)                      |
| 8 years                       | 9.8% (86)               | 4.3% (25)                                        | 0.0% (0)                     | 30.1% (34)                                      | 43.5% (27)                      |
| Wheezing reported at          |                         |                                                  |                              |                                                 |                                 |
| 1 year                        | 24.1% (376)             | 12.5% (131)                                      | 59.5% (132)                  | 27.5% (50)                                      | 56.8% (63)                      |
| 2 years                       | 16.2% (231)             | 7.8% (75)                                        | 46.1% (88)                   | 16.5% (28)                                      | 39.2% (40)                      |
| 3 years                       | 12.9% (168)             | 3.6% (31)                                        | 37.2% (68)                   | 15.3% (25)                                      | 45.4% (44)                      |
| 4 years                       | 13.1% (159)             | 4.0% (32)                                        | 35.5% (61)                   | 10.0% (15)                                      | 54.8% (51)                      |
| 5 years                       | 12.4% (147)             | 3.5% (27)                                        | 39.2% (65)                   | 9.2% (14)                                       | 45.6% (41)                      |
| 8 years                       | 8.6% (75)               | 1.5% (9)                                         | 23.1% (27)                   | 6.3% (7)                                        | 51.6% (32)                      |
| Asthma medication reported at |                         |                                                  |                              |                                                 |                                 |
| 1 year                        | 8.6% (134)              | 0.2% (2)                                         | 38.3% (85)                   | 0.0% (0)                                        | 42.3% (47)                      |
| 2 years                       | 5.0% (70)               | 0.1% (1)                                         | 23.4% (44)                   | 0.0% (0)                                        | 25.5% (25)                      |
| 3 years                       | 6.5% (83)               | 0.0% (0)                                         | 25.6% (46)                   | 0.0% (0)                                        | 39.8% (37)                      |
| 4 years                       | 8.4% (102)              | 0.5% (4)                                         | 30.6% (52)                   | 0.0% (0)                                        | 50.5% (46)                      |
| 5 years                       | 11.3% (141)             | 1.8% (15)                                        | 40.2% (72)                   | 0.6% (1)                                        | 54.6% (53)                      |
| 8 years                       | 6.7% (59)               | 0.2% (1)                                         | 20.7% (24)                   | 0.9% (1)                                        | 53.2% (33)                      |
| Asthma diagnosis reported at  |                         |                                                  |                              |                                                 |                                 |
| 1 year †                      | 8.8% (137)              | 0.1% (1)                                         | 38.7% (86)                   | 1.6% (3)                                        | 42.3% (47)                      |
| 2 years †                     | 5.2% (73)               | 0.2% (2)                                         | 23.0% (43)                   | 0.0% (0)                                        | 28.9% (28)                      |
| 3 years †                     | 7.4% (95)               | 0.1% (1)                                         | 27.9% (50)                   | 1.9% (3)                                        | 44.1% (41)                      |
| 4 years †                     | 9.1% (110)              | 0.3% (2)                                         | 36.5% (61)                   | 0.0% (0)                                        | 51.6% (47)                      |
| 5 years †                     | 11.6% (138)             | 0.5% (4)                                         | 43.7% (73)                   | 3.9% (6)                                        | 60.4% (55)                      |
| 8 years †                     | 10.0% (88)              | 0.2% (1)                                         | 38.8% (45)                   | 2.7% (3)                                        | 62.9% (39)                      |
| Rhinitis reported at          |                         |                                                  |                              |                                                 |                                 |
| 2 years                       | 7.4% (105)              | 4.2% (40)                                        | 6.9% (13)                    | 20.0% (34)                                      | 18.2% (18)                      |
| 3 years                       | 8.6% (113)              | 3.7% (32)                                        | 6.5% (12)                    | 21.2% (35)                                      | 34.7% (34)                      |
| 4 years                       | 7.3% (89)               | 2.8% (22)                                        | 7.0% (12)                    | 12.7% (19)                                      | 40.0% (36)                      |
| 5 years                       | 8.6% (102)              | 4.0% (31)                                        | 9.1% (15)                    | 17.2% (26)                                      | 33.3% (30)                      |
| 8 years                       | 9.6% (84)               | 4.1% (24)                                        | 12.0% (14)                   | 18.6% (21)                                      | 40.3% (25)                      |

Values are % ( $n$ ), †: based on a diagnosis by a physician since birth. Food allergy was defined as the positive answer to the question “Has a doctor ever diagnosed your child with a food allergy?”. Eczema was defined as a positive answer to three items: “Has your child ever been diagnosed with eczema?”, “(Since last follow-up), has your child had an itchy rash (red patches, pimples, etc.) on

the skin that appears and disappears intermittently?”, “Has this itchy rash affected any of the following areas: the folds of the elbows, behind the knees, in front of the ankles, under the buttocks, around the neck, around the eyes or ears?”. Wheezing was defined by the positive answer to the question “Has your child had wheezing in the chest at any time (since last follow-up)?”. Medication for asthma was defined as the positive answers to two items: “(Since the last follow-up), has your child had an asthma attack?” and “Has this problem required at least one treatment prescribed by a physician?”. Asthma diagnosis was defined as the positive answer to the question “Has your child ever been diagnosed with asthma by a doctor?”. Rhinitis was defined as a positive answer to two items: “(Since last follow-up) has your child had sneezing, a runny nose or a stuffy nose without respiratory infection (no cold, no rhinopharyngitis, no flu...)? Were these nose problems accompanied by watering (crying) or itching (scratching) of the eyes?”. The allergic and respiratory variables presented in this table were not used in the construction of the clusters.

**Table S4.** Sociodemographic and perinatal characteristics of allergic and respiratory multimorbidity clusters up to 8 years ( $n = 1593$ ).

|                                              | Allergic and respiratory multimorbidity clusters |                |                             |                |
|----------------------------------------------|--------------------------------------------------|----------------|-----------------------------|----------------|
|                                              | asymptomatic                                     | asthma only    | allergies<br>without asthma | multi-allergic |
|                                              | $n = 1075$                                       | $n = 223$      | $n = 184$                   | $n = 111$      |
| Center                                       |                                                  |                |                             |                |
| Poitiers                                     | 48.2% (518)                                      | 57.8% (129)    | 40.8% (75)                  | 63.1% (70)     |
| Nancy                                        | 51.8% (557)                                      | 42.2% (94)     | 59.2% (109)                 | 36.9% (41)     |
| Maternal age at delivery (years)             | $29.8 \pm 4.8$                                   | $29.6 \pm 4.8$ | $30.0 \pm 4.8$              | $29.3 \pm 4.5$ |
| Maternal education                           |                                                  |                |                             |                |
| Up to lower secondary                        | 5.2% (56)                                        | 4.1% (9)       | 6.0% (11)                   | 4.5% (5)       |
| Upper secondary                              | 18.4% (196)                                      | 24.8% (55)     | 20.7% (38)                  | 20.7% (23)     |
| Intermediate                                 | 18.1% (193)                                      | 22.5% (50)     | 10.9% (20)                  | 20.7% (23)     |
| 2-year university degree                     | 22.4% (239)                                      | 20.3% (45)     | 23.9% (44)                  | 25.2% (28)     |
| $\geq 3$ -year university degree             | 36.0% (384)                                      | 28.4% (63)     | 38.6% (71)                  | 28.8% (32)     |
| Household income (euros /month)              |                                                  |                |                             |                |
| < 800                                        | 3.8% (41)                                        | 1.8% (4)       | 2.2% (4)                    | 3.6% (4)       |
| 801–1500                                     | 9.7% (104)                                       | 9.0% (20)      | 10.9% (20)                  | 13.5% (15)     |
| 1501–2300                                    | 28.6% (305)                                      | 35.1% (78)     | 25.0% (46)                  | 33.3% (37)     |
| 2301–3000                                    | 26.7% (285)                                      | 27.9% (62)     | 32.6% (60)                  | 30.6% (34)     |
| > 3000                                       | 31.1% (332)                                      | 26.1% (58)     | 29.3% (54)                  | 18.9% (21)     |
| Smoking during pregnancy                     | 22.1% (232)                                      | 21.5% (47)     | 29.4% (53)                  | 27.5% (30)     |
| Pre-pregnancy BMI ( $\text{kg}/\text{m}^2$ ) | $23.0 \pm 4.5$                                   | $24.0 \pm 4.9$ | $22.8 \pm 3.6$              | $23.2 \pm 4.3$ |
| Primiparity                                  | 47.3% (507)                                      | 43.2% (96)     | 44.0% (81)                  | 45.0% (50)     |
| Season of birth                              |                                                  |                |                             |                |
| Autumn/winter                                | 44.9% (483)                                      | 44.4% (99)     | 50.5% (93)                  | 45.9% (51)     |
| Spring/summer                                | 55.1% (592)                                      | 55.6% (124)    | 49.5% (91)                  | 54.1% (60)     |
| Boys                                         | 49.0% (527)                                      | 64.6% (144)    | 48.9% (90)                  | 60.4% (67)     |
| Family history of allergy                    | 46.3% (498)                                      | 61.0% (136)    | 65.8% (121)                 | 75.7% (84)     |
| Gestational age (weeks)                      | $39.4 \pm 1.5$                                   | $39.1 \pm 2.1$ | $39.2 \pm 1.6$              | $38.8 \pm 2.3$ |
| Birth weight (g)                             | $3291 \pm 472$                                   | $3287 \pm 562$ | $3303 \pm 568$              | $3183 \pm 569$ |

Values are % ( $n$ ) or mean  $\pm$  standard deviation; BMI: Body Mass Index.
